# Supplementary material for: Spontaneous pattern formation based on the coffee-ring effect for organic–inorganic hybrid films prepared by dip-coating: effects of temperature during deposition
Source: Royal Society of Chemistry journal article supplement (doi:10.1039/c2sm26328a), 2012-01-01
Supplement: c2sm26328a.pdf [file c2sm26328a.pdf]

## Spontaneous pattern formation based on coffee-ring effect for organic-inorganic hybrid films prepared by dip-coating: Effects of temperature during deposition

Hiroaki Uchiyama\*, Daisuke Shimaoka, Hiromitsu Kozuka

E-mail address: [h\\_uchi@kansai-u.ac.jp](mailto:h_uchi@kansai-u.ac.jp) (H. Uchiyama).

### Ten point height of irregularities, $R_z$

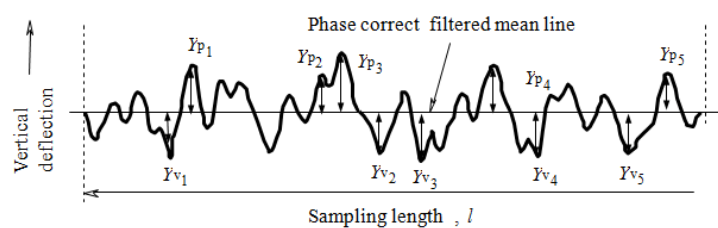

$$R_z = \frac{1}{5} \sum_{i=1}^5 (|Y_{p_i}| + |Y_{v_i}|)$$

### Mean spacing of local peaks, $S$

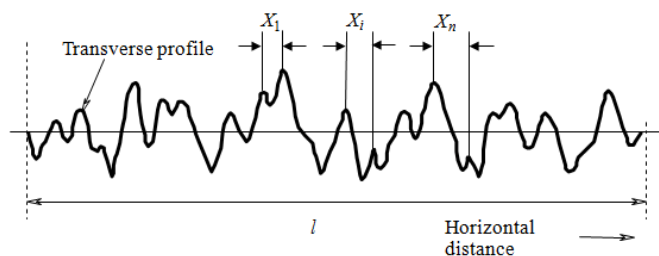

$$S = \frac{1}{n} \sum_{i=1}^n X_i$$

### Film thickness

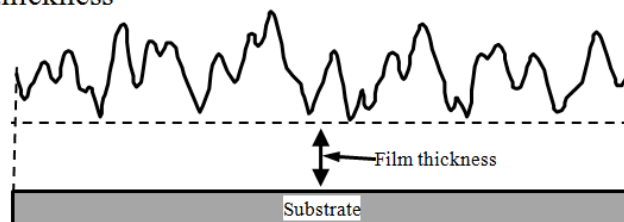

Figure S1. Surface roughness parameters,  $R_z$  (10 point height of irregularities) and  $S$  (mean spacing of local peaks of the profile), and the definition of film thickness.

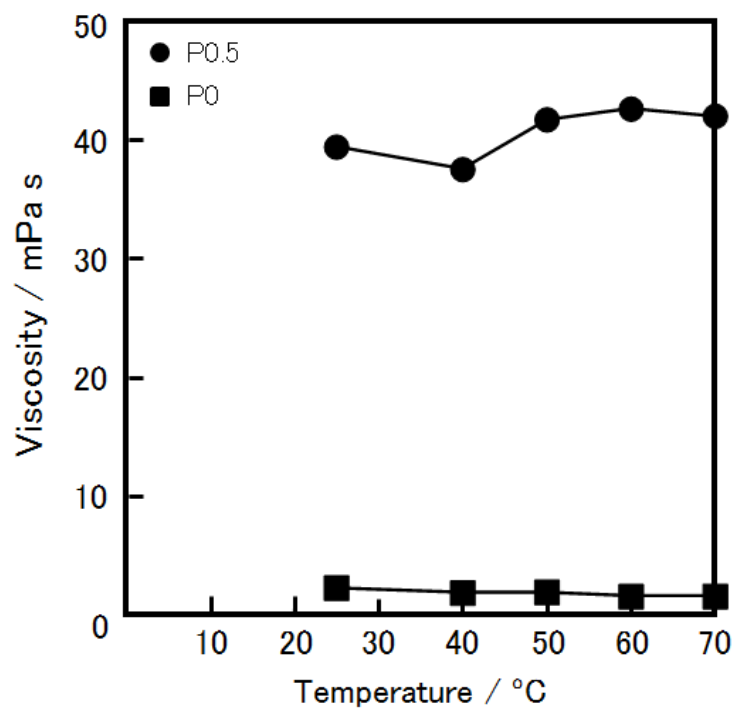

Figure S2. Dependence of viscosity on temperature for the coating solutions without and with PVP (Solutions P0 and P0.5).
